# Supplementary material for: Unlocking the synergetic potential of cobalt iron phosphate and multiwalled carbon nanotube composites towards supercapacitor application
Source: Royal Society of Chemistry journal article supplement (doi:10.1039/d4ta00247d), 2024-01-01
Supplement: d4ta00247d1.pdf [file d4ta00247d1.pdf]

## 1 Section-I

### 2 Characterizations

3 X-ray diffraction (XRD) patterns for iron phosphate and copper substrate were  
4 investigated by Bruker D2-Phaser diffractometer facilities with  $\text{CuK}_\alpha$  radiation ( $\lambda=1.5406 \text{ \AA}$ ),  
5 10 mA applied current, and 30 kV accelerating voltage. The morphological properties of the  
6 thin films were captured using a field emission scanning electron microscopy (FESEM,  
7 SUPRA – 40 VP, Zeiss Marlin, Germany) and an energy dispersive X-ray spectrometer (EDX).  
8 X-ray photoelectron spectroscopy (XPS) was investigated using a Matlab 2000 photoelectron  
9 spectrophotometer and consistent AlK X-ray radiations (600 W;  $h\nu = 1486.6 \text{ eV}$ ). HR-TEM  
10 analysis was performed by FEI Tecnai G2F30 (FEI, Netherland).

### 11 Electrochemical Study

12 A potentiostat (Princeton Applied Research, PARSTAT-4000, USA) with a three-  
13 electrode configuration, electrochemical capabilities including cyclic voltammetry (CV),  
14 galvanostatic charge-discharge (GCD), and electrochemical impedance spectroscopy (EIS)  
15 were studied. To investigate all electrochemical characteristics, a working electrode with active  
16 area of  $1 \times 1 \text{ cm}^2$  was used. A liquid state device was fabricated and electrochemical  
17 investigations were carried out through two electrodes configuration.

## 18 Section II

19 Specific capacitance values were calculated by using CV from the following equation<sup>1</sup>

$$20 \quad C_{sp} = \frac{\int IdV}{m v (V_f - V_i)} \quad (S1)$$

21 Specific capacitance values were calculated by using GCD from the following equation<sup>2</sup>.

$$C_{Sp} = \frac{2I \int V dt}{m(V_f - V_i)^2} \quad (S2)$$

1

2 Where  $C_{sp}$  is specific capacitance,  $i$  is current density,  $m$  is active mass,  $V_f - V_i$  potential  
 3 window or working potential.

4 Specific Capacity

$$C_s = \frac{\int_{V_1}^{V_2} I(V) dV}{vm} \quad (S3)$$

5

6 where,  $C_s$  is specific capacity (C/g),  $I$  (A) is the cathodic or anodic current,  $dV$  (V) is the  
 7 operated potential window,  $v$  (V/s) is the applied scan rate,  $m$  (g) is the deposited mass on Cu  
 8 substrate.

9

10

11

1 Section-III

2

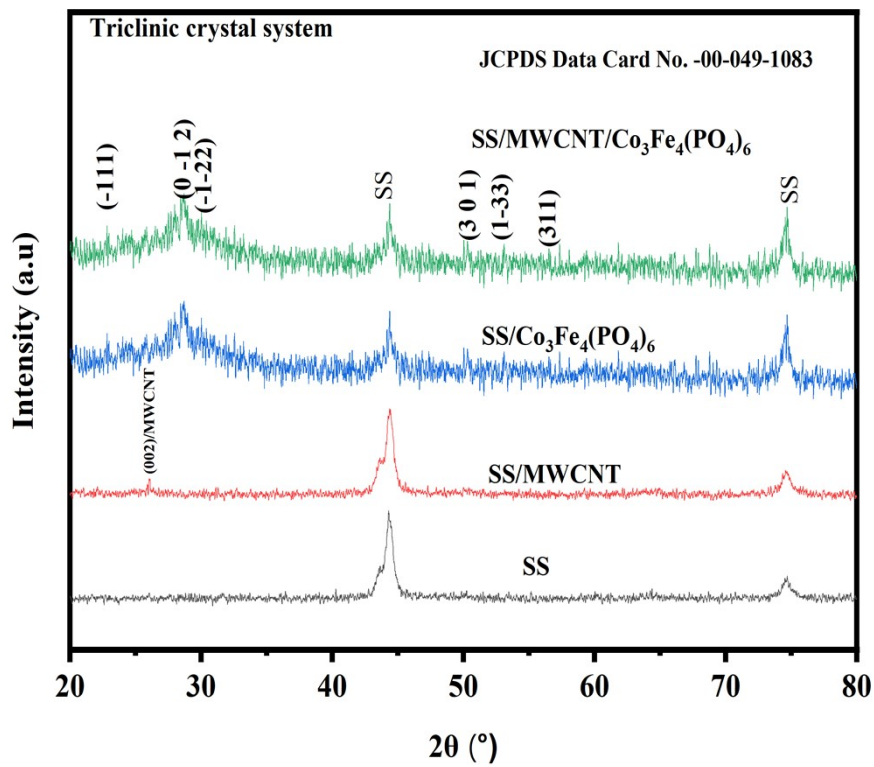

**Figure S1:** Comparative XRD of SS, MWCNTs,  $\text{Co}_3\text{Fe}_4(\text{PO}_4)_6$ , and MWCNTs/ $\text{Co}_3\text{Fe}_4(\text{PO}_4)_6$ .

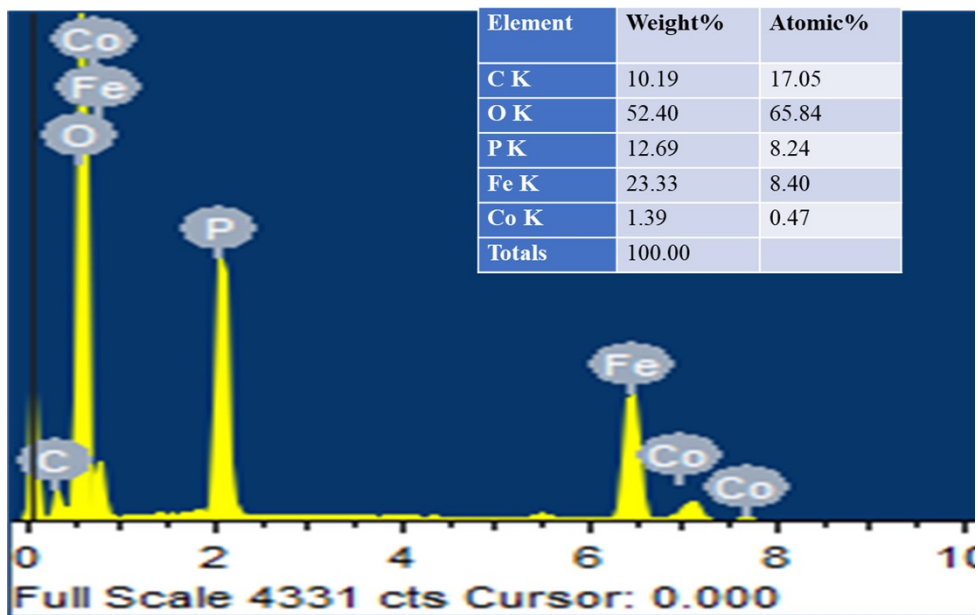

**Figure S2** EDX analysis of MWCNTs/ $\text{Co}_3\text{Fe}_4(\text{PO}_4)_6$  thin film

1

2 In our preceding article, we presented an analysis of the electrochemical performance  
3 of  $\text{Fe}_7(\text{PO}_4)_6^3$  and  $\text{MWCNTs}/\text{Co}_2\text{P}_2\text{O}_7^4$  in a KOH electrolyte. Figure S3 illustrates the  
4 comparative cyclic voltammetry (CV) of MWCNTs,  $\text{Fe}_7(\text{PO}_4)_6$ ,  $\text{Co}_2\text{P}_2\text{O}_7$ , and MWCNTs/  
5  $\text{Co}_3\text{Fe}_4(\text{PO}_4)_6$ . Notably, the potential window of MWCNTs/ $\text{Co}_3\text{Fe}_4(\text{PO}_4)_6$  (0.9 V) surpasses that  
6 of the previously reported  $\text{Fe}_7(\text{PO}_4)_6$  (0.71 V) and  $\text{Co}_2\text{P}_2\text{O}_7$  (0.5 V), indicating a marked  
7 enhancement in the electrochemical performance of the bimetallic phosphate.  $\text{Co}^{+2/+1}$  reduction  
8 potential -0.28 V and for  $\text{Fe}^{+3/+2}$  is 0.77 V, but we didn't observe any sharp reduction peak at -  
9 0.28 V and 0.77 V fall out of scanning voltage range. This show the fabricated material is  
10 pseudocapacitive material dominated with surface redox activity contributing in the charge

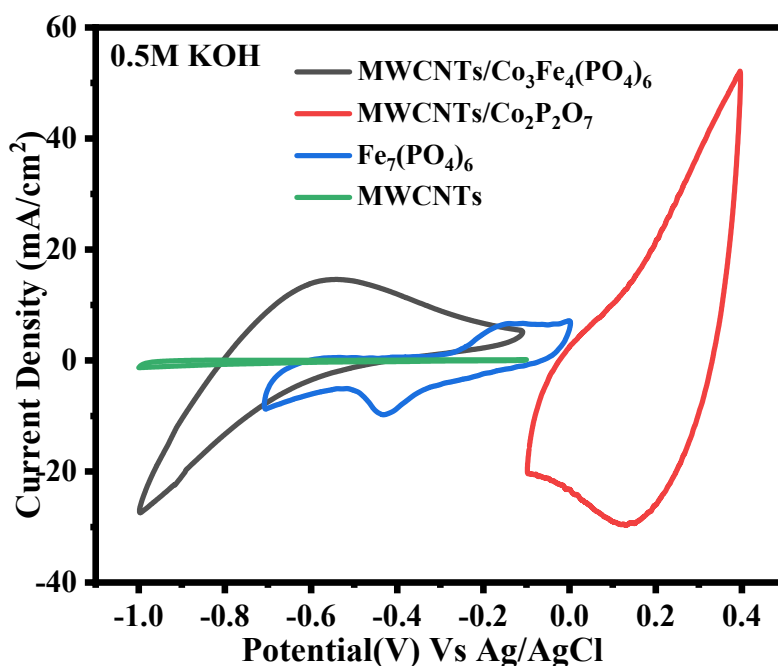

Figure S3 Comparative CV at 100 mV/s of MWCNTs,  $\text{Fe}_7(\text{PO}_4)_6$ ,  $\text{Co}_2\text{P}_2\text{O}_7$ , MWCNTs/ $\text{Co}_3\text{Fe}_4(\text{PO}_4)_6$ .

11 storage<sup>5-7</sup>.

12 Furthermore, there is a significant improvement in specific capacitances, with  
13 MWCNTs/ $\text{Co}_3\text{Fe}_4(\text{PO}_4)_6$  exhibiting a specific capacitance of 859 C/g, compared to 450 C/g

1 for  $\text{Co}_2\text{P}_2\text{O}_7$  and 104 C/g (147 F/g) for  $\text{Fe}_7(\text{PO}_4)_6$ . This improvement underscores the  
2 enhanced efficacy of the bimetallic phosphate in energy storage due to synergetic effect  
3 between  $\text{Co}_3\text{Fe}_4(\text{PO}_4)_6$  and MWCNTs. In Figure S3, the area under the curve for  
4 MWCNT/ $\text{Co}_2\text{P}_2\text{O}_7$  is indeed large, mainly due to its higher mass loading of 1.7 mg compared  
5 to MWCNT/ $\text{Co}_3\text{Fe}_4(\text{PO}_4)_6$  with only 0.2 mg. This higher mass loading contributes to its  
6 lower specific capacitance. Additionally, the potential window of the electrode is also higher  
7 by 0.4 V for MWCNT/ $\text{Co}_3\text{Fe}_4(\text{PO}_4)_6$  compared to MWCNT/ $\text{Co}_2\text{P}_2\text{O}_7$ , indicating the  
8 superiority of MWCNT/ $\text{Co}_3\text{Fe}_4(\text{PO}_4)_6$ .

9

10

11

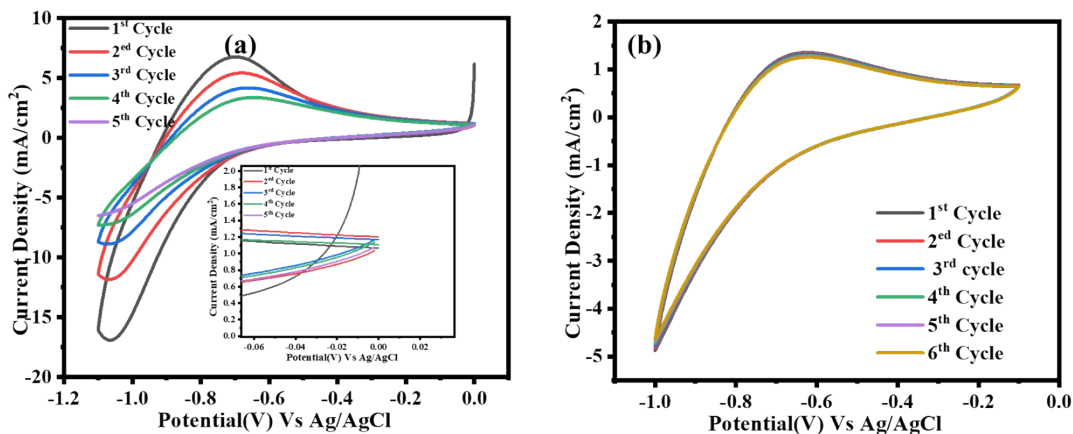

**Figure S4** (a) CV analysis in potential range 0 to -1.1 V (b) CV analysis in potential range -0.1 to -1 V

12

1

2

3

4

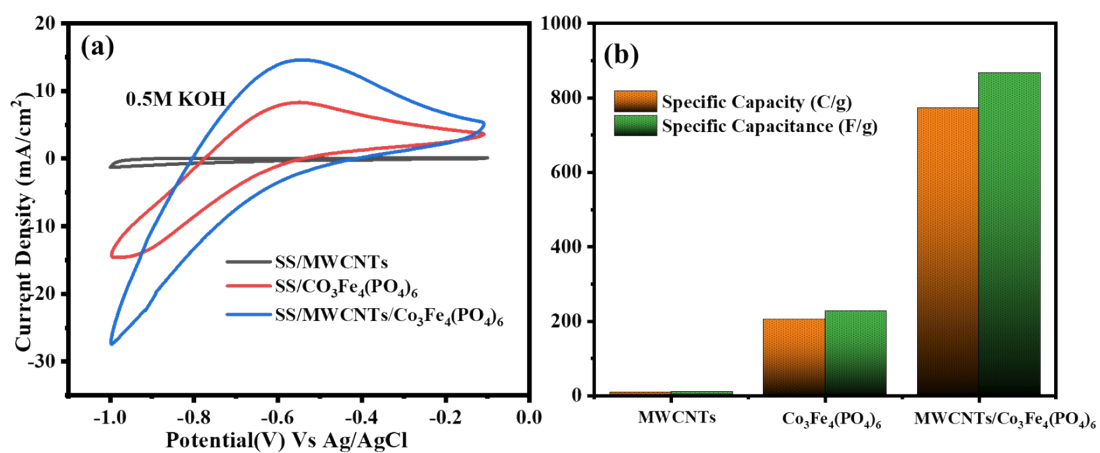

**Figure S5** (a) CV of Co<sub>3</sub>Fe<sub>4</sub>(PO<sub>4</sub>)<sub>6</sub>, MWCNTs, and MWCNTs/Co<sub>3</sub>Fe<sub>4</sub>(PO<sub>4</sub>)<sub>6</sub> in 0.5 M KOH (b) corresponding Specific capacity and specific capacitance with different electrode

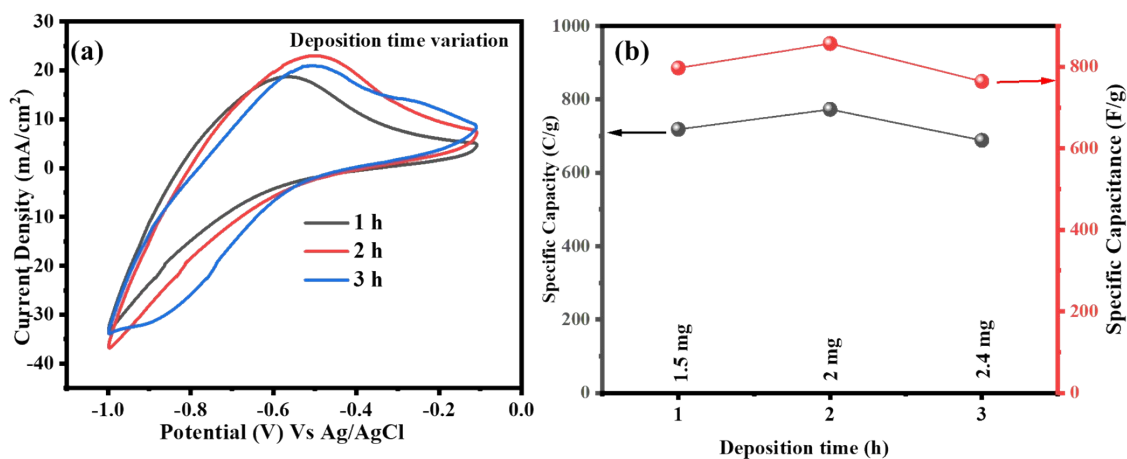

**Figure S6** (a) CV of  $\text{Co}_3\text{Fe}_4(\text{PO}_4)_6$ , MWCNTs, and MWCNTs/ $\text{Co}_3\text{Fe}_4(\text{PO}_4)_6$  in 0.5 M KOH (b) specific capacity and capacitance of deposition time varied electrode

1

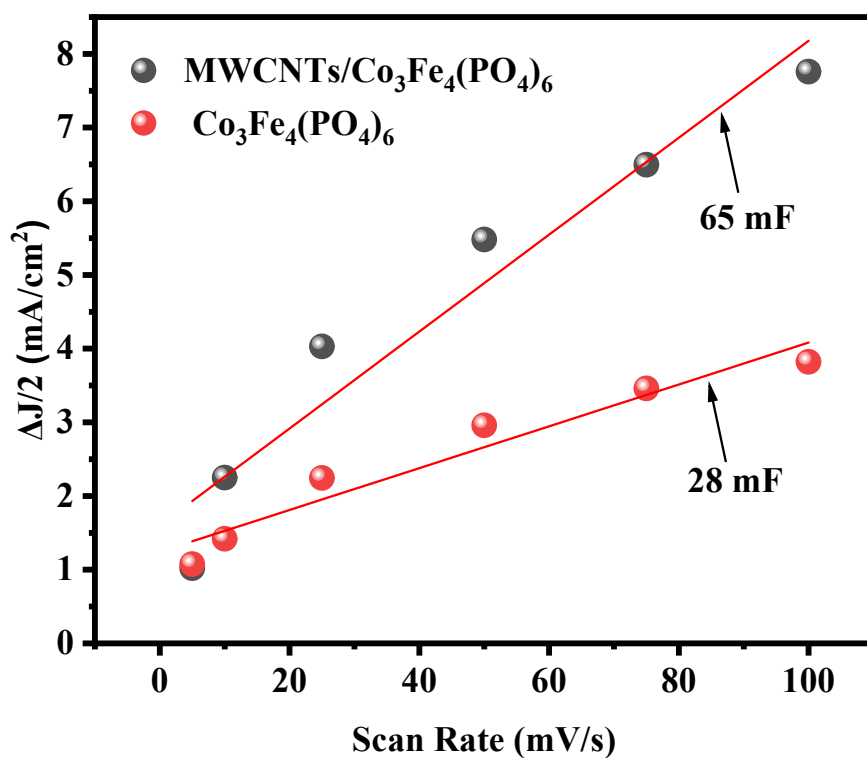

**Figure S7**  $\Delta j/2$  vs. scan rate





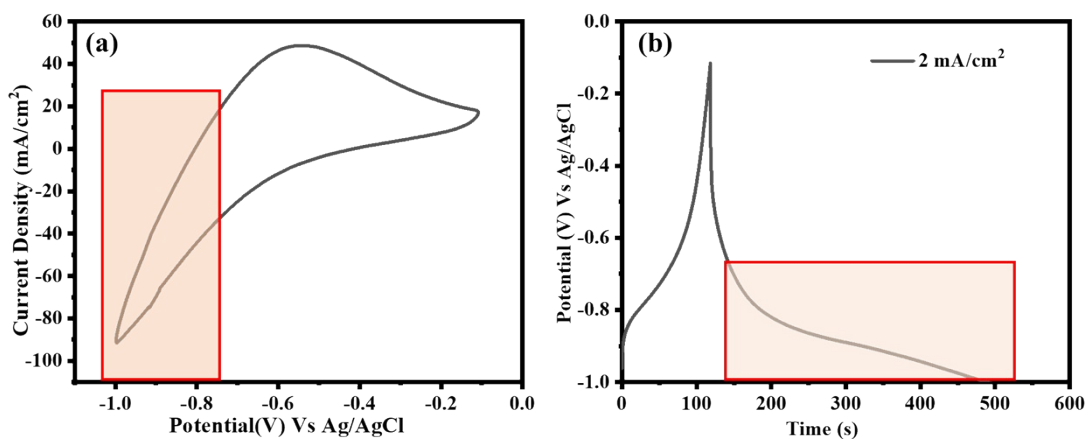

**Figure S8** (a) CV at 100 mV/s scan rate (b) GCD at 2 mA/cm<sup>2</sup>

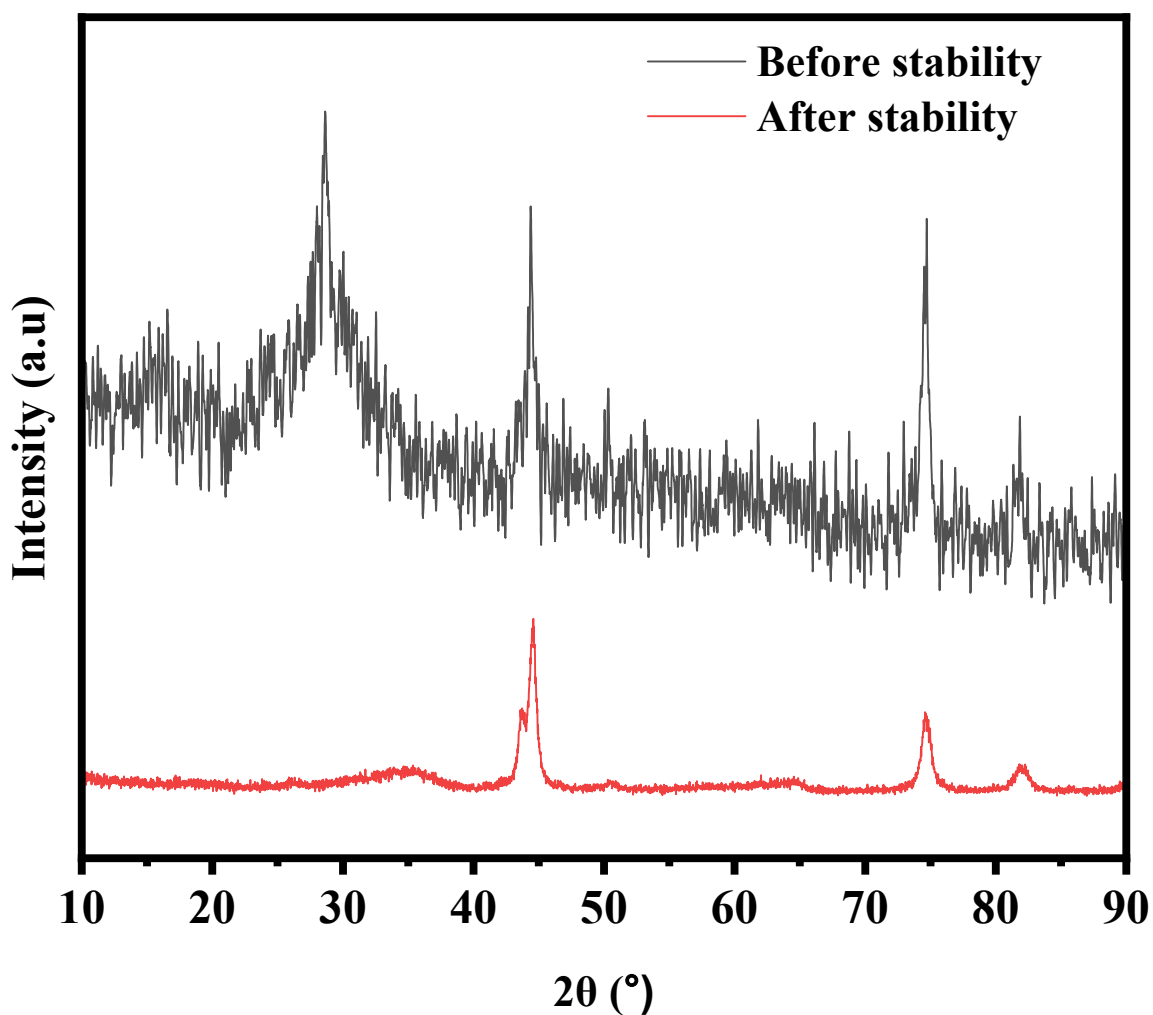

**Figure S9** XRD investigation before and after complete electrochemical investigation

1

2

3

4

5

6

7

8

9

10

11

12

13

14

| <b>Table No S1 XPS peak assignment</b> |                            |                      |
|----------------------------------------|----------------------------|----------------------|
| <b>Sr. No</b>                          | <b>Binding energy (eV)</b> | <b>Assigned peak</b> |
| 1                                      | 29.1                       | P3s                  |
| 2                                      | 58.2                       | Fe3p                 |
| 3                                      | 135                        | P2p                  |
| 4                                      | 194.1                      | P2s                  |
| 5                                      | 285.1                      | C1s                  |
| 6                                      | 533.1                      | O1s                  |
| 7                                      | 712 to 735                 | Fe2p                 |
| 8                                      | 779 to 800                 | Co2p                 |
| 9                                      | 979                        | OKL1                 |
| 10                                     | 999                        | OKL2                 |

| <b>Table No S2 EIS Fittings<br/>valves</b> |              |
|--------------------------------------------|--------------|
| <b>Component</b>                           | <b>Value</b> |
| $R_s$ ( $\Omega/\text{cm}^2$ )             | 3.852        |
| $C_{dl1}$ (F/ $\text{cm}^2$ )              | 0.000309     |
| $R_{ct}$ ( $\Omega/\text{cm}^2$ )          | 0.9664       |
| $C_{dl2}$ (F/ $\text{cm}^2$ )              | 0.001625     |
| $R_L$ ( $\Omega/\text{cm}^2$ )             | 0.5411       |
| W                                          | 0.1484       |

## 1 References

- 2 1 B. Pandit, D. P. Dubal and B. R. Sankapal, *Electrochim. Acta*, 2017, **242**, 382–389.
- 3 2 H. M. El Sharkawy, D. M. Sayed, A. S. Dhmees, R. M. Aboushahba and N. K. Allam,  
4 *ACS Appl. Energy Mater.*, 2020, **3**, 9305–9314.
- 5 3 T. B. Deshmukh, P. Babar, T. Kedara Shivasharma and B. R. Sankapal, *Surfaces and*  
6 *Interfaces*, 2022, **35**, 102419.
- 7 4 A. Agarwal and B. R. Sankapal, *Sustain. Energy Fuels*, 2022, **6**, 4085–4101.
- 8 5 F. Scholz, *Electroanalytical methods: Guide to experiments and applications*, 2010.
- 9 6 S. Azmi and E. Frackowiak, *Electrochem. commun.*, 2022, **138**, 107289.
- 10 7 S. Shiraishi, *Electric Double Layer Capacitor*, Elsevier Ltd, 2016, vol. 2.

11
